# Supplementary material for: Parent and household influences on calcium intake among early adolescents
Source: Springer Nature journal article supplement (doi:10.1186/s12889-018-6297-5), 2018-12-01
Supplement: MOESM2 [file 16353612]

# Flow diagram showing details of final sample size

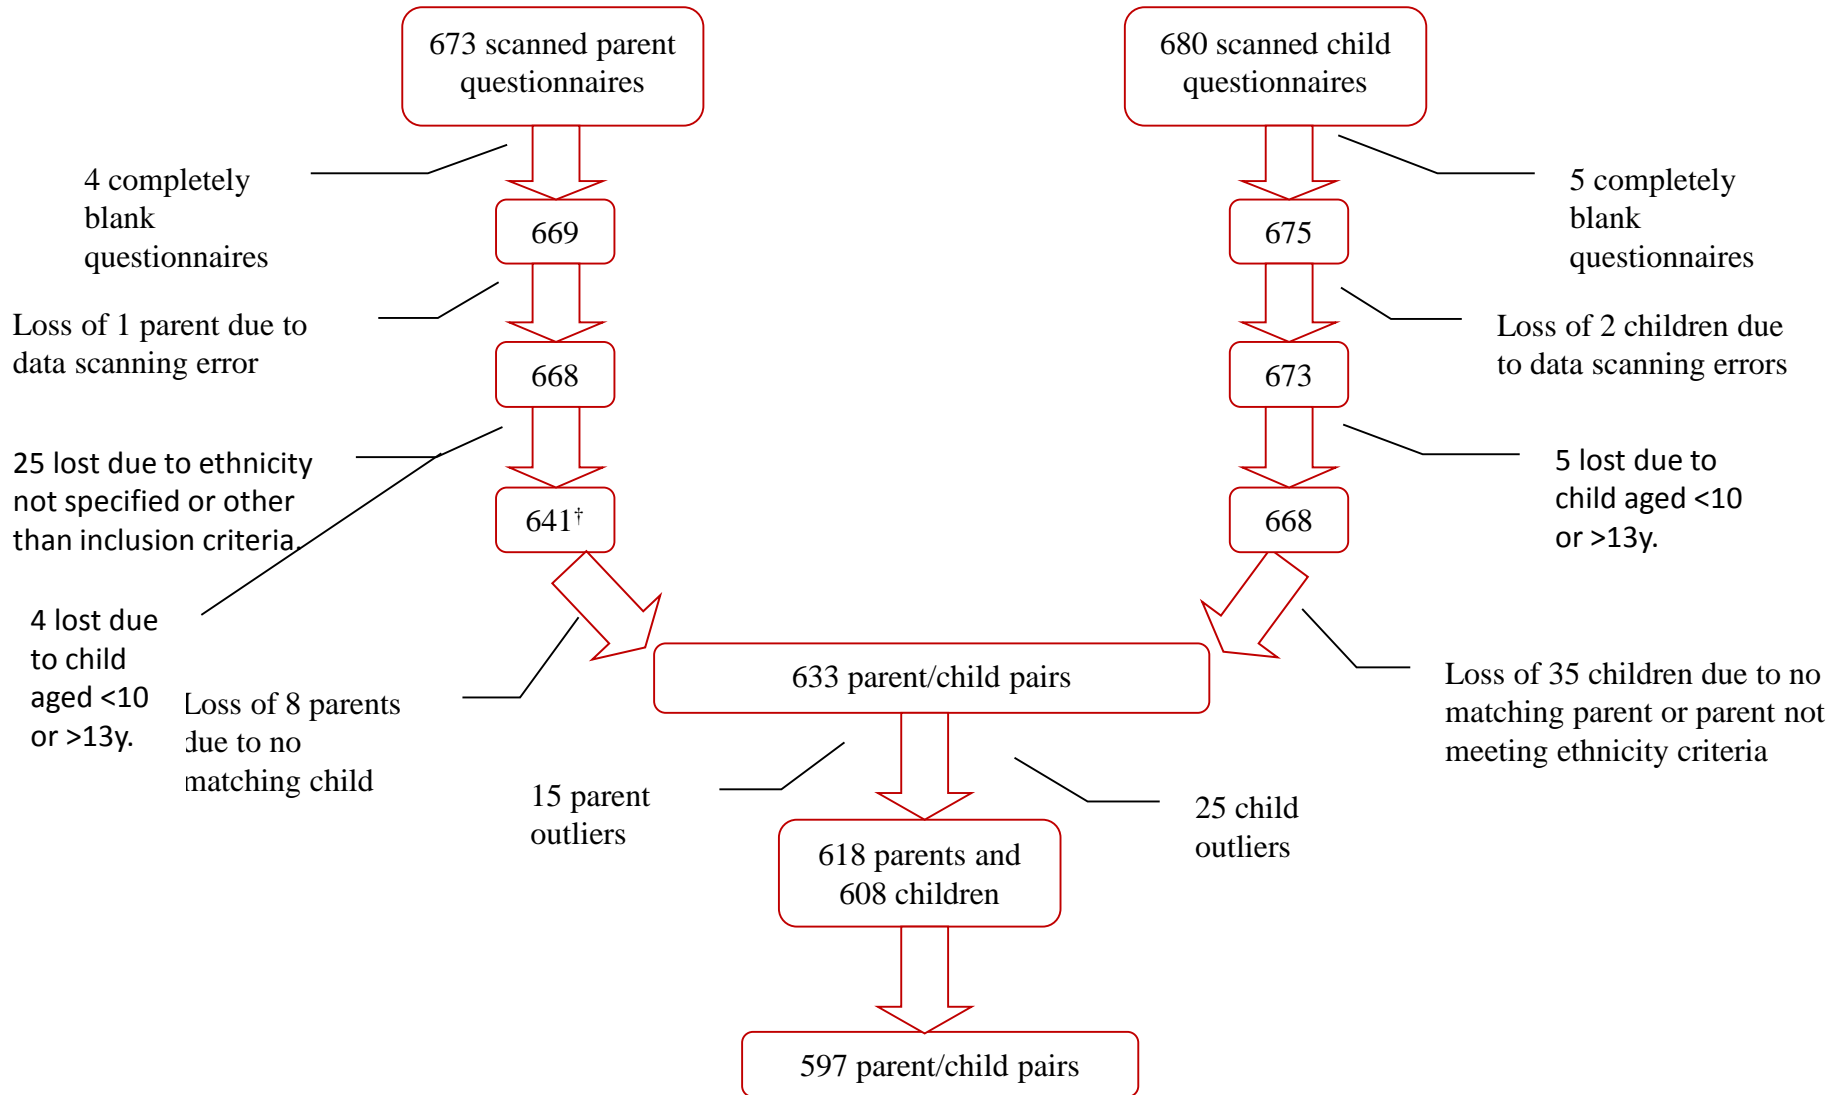

<sup>†</sup>In some cases, participants did not meet inclusion criteria for more than one reason, therefore duplicates exist and numbers do not add up.
